# Supplementary material for: Two critical positions in zinc finger domains are heavily mutated in three human cancer types
Source: PLoS Comput Biol. 2018 Jun 28;14(6):e1006290. doi: 10.1371/journal.pcbi.1006290 (PMC6040777; doi:10.1371/journal.pcbi.1006290)
Supplement: S1 Text — (PDF) [file pcbi.1006290.s001.pdf]

# Supplementary Text

for “Two critical positions in zinc finger domains are heavily mutated in three human cancer types”

**Mutation peaks at p9 and p11 are robust to mutation calls.** In the main text, we analysed mutations called by MuTect2 [1]. However, the mutational peaks are also evident when using mutations called by MuSE [2], SomaticSniper [3] and VarScan2 [4] (Supplemental Figure S3a), as well as when using a filtered dataset [5] that began with mutation data from various callers for a subset of the samples that were available in 2013 and then removed known false positives and germ line variations found in dbSNP [6] (Supplemental Figure S3b). To confirm that the peaks were not a result of misaligned reads, we examined the mappability scores of the genomic locations of the mutations (ENCODE Accession ENCSR821KQV [7]). We found that the peaks remained when conservatively filtering mutations by requiring perfect 36-mer mappability scores (Supplemental Figure S3c).

Recently, it has been reported that in some sequencing samples, many low to moderate frequency (1 to 5%) G→T variant calls are false positives caused by DNA damage incurred during sample preparation [8]. To rule out the possibility that the AGA→ATA mutations (R9I) found in UCEC and COAD/READ were found in samples containing a large number of experimental artifacts, we used the Damage-estimator code provided by Chen et al. [8] in their study. Only 4 of 55 UCEC and 5 of 15 COAD/READ samples with R9I mutations were characterized as damaged via this software. Moreover, the ZF position 9 mutation peaks persist even when these samples are removed (Supplemental Figure S3d), and even when all domains with AGA→ATA mutations at position 9 are removed (Supplemental Figure S3e). Finally, box plots of the tumor sample allele frequencies of R9I UCEC and COAD/READ mutations and H11Y SKCM mutations are given in Supplemental Figure S4, and demonstrate that these mutations are not low frequency, but with median frequencies of 33%, 29% and 31%, respectively.

## References

1. DePristo, M. A. et al. A framework for variation discovery and genotyping using next-generation DNA sequencing data. *Nature Genetics* 43, 491498 (2011).
2. Fan, Y. et al. MuSE: accounting for tumor heterogeneity using a sample-specific error model improves sensitivity and specificity in mutation calling from sequencing data. *Genome Biology* 17, 178 (2016).

3. Larson, D. E. *et al.* SomaticSniper: identification of somatic point mutations in whole genome sequencing data. *Bioinformatics* 28, 311–317 (2011).
4. Koboldt, D. C. *et al.* VarScan 2: somatic mutation and copy number alteration discovery in cancer by exome sequencing. *Genome Research* 22, 568576 (2012).
5. Kandoth, C. *et al.* Mutational landscape and significance across 12 major cancer types. *Nature* 502, 3339 (2013).
6. Sherry, S. T. *et al.* dbSNP: the NCBI database of genetic variation. *Nucleic Acids Res* 29, 308311 (2001).
7. ENCODE Project Consortium. An integrated encyclopedia of DNA elements in the human genome. *Nature* 489, 57-74 (2012).
8. Chen, L., *et al.* DNA damage is a pervasive cause of sequencing errors, directly confounding variant identification. *Science* 355, 752756 (2017).
